# Supplementary material for: Syntheses, structures and ligand binding modes of titanium-oxide complexes of 2-picolinate
Source: Royal Society of Chemistry journal article supplement (doi:10.1039/d1dt04170c), 2022-01-01
Supplement: d1dt04170c1.pdf [file d1dt04170c1.pdf]

Supporting Information

## **Syntheses, Structures and Ligand Binding Modes of Titanium-Oxide Complexes of 2-Picolinate**

Chang Gao,<sup>a</sup> Caiyun Liu,<sup>a</sup> Amir Said,<sup>a</sup> Huihui Niu,<sup>a</sup> Dexin Wang,<sup>a</sup> Guo Wang,<sup>c</sup> Chen-Ho Tung,<sup>a</sup> and Yifeng Wang<sup>\*ab</sup>

<sup>a</sup>*Key Lab for Colloid and Interface Science of Ministry of Education, School of Chemistry and Chemical Engineering, Shandong University, Jinan 250100, China*

<sup>b</sup>*State Key Laboratory of Crystal Materials, Shandong University, Jinan 250100, China*

<sup>c</sup>*Department of Chemistry, Capital Normal University, Beijing 100048, China*

Corresponding author email: [yifeng@sdu.edu.cn](mailto:yifeng@sdu.edu.cn)

## S1. The table of crystallographic data

| Compound                                     | <b>Ti<sub>19</sub>(PA)<sub>19</sub></b>                                                                                                                                                                                                 | <b>Ti<sub>18</sub>(PA)<sub>8</sub></b>                                                                                                                                           | <b>Ti<sub>14</sub>(PA)<sub>6</sub></b>                                                                                                                                                                                                                                     |
|----------------------------------------------|-----------------------------------------------------------------------------------------------------------------------------------------------------------------------------------------------------------------------------------------|----------------------------------------------------------------------------------------------------------------------------------------------------------------------------------|----------------------------------------------------------------------------------------------------------------------------------------------------------------------------------------------------------------------------------------------------------------------------|
| Formula unit                                 | Ti <sub>19</sub> O <sub>70</sub> N <sub>26.5</sub> C <sub>137</sub> H <sub>125.5</sub>                                                                                                                                                  | Ti <sub>18</sub> O <sub>61</sub> N <sub>8</sub> C <sub>69</sub> H <sub>92</sub>                                                                                                  | Ti <sub>14</sub> O <sub>46</sub> N <sub>10</sub> C <sub>90</sub> H <sub>154</sub>                                                                                                                                                                                          |
| CCDC number                                  | 2126650                                                                                                                                                                                                                                 | 2126649                                                                                                                                                                          | 2126646                                                                                                                                                                                                                                                                    |
| Moieties                                     | [H <sub>4</sub> Ti <sub>19</sub> O <sub>30</sub> (O <sub>2</sub> NC <sub>6</sub> H <sub>4</sub> ) <sub>19</sub> (OC <sub>3</sub> H <sub>7</sub> ) <sub>2</sub> ](NC <sub>4</sub> H <sub>12</sub> )·6.5(NC <sub>2</sub> H <sub>3</sub> ) | [Ti <sub>18</sub> O <sub>22</sub> (O <sub>2</sub> NC <sub>6</sub> H <sub>4</sub> ) <sub>8</sub> (OCH <sub>3</sub> ) <sub>18</sub> ]·2(O <sub>2</sub> CH)<br>·(OCH <sub>4</sub> ) | [H <sub>2</sub> Ti <sub>14</sub> O <sub>20</sub> (O <sub>2</sub> NC <sub>6</sub> H <sub>4</sub> ) <sub>6</sub> (OC <sub>3</sub> H <sub>7</sub> ) <sub>12</sub> ]·2(NC <sub>4</sub> H <sub>11</sub> )·2(NC <sub>2</sub> H <sub>3</sub> )·2(OC <sub>3</sub> H <sub>8</sub> ) |
| Formula weight (g/mol)                       | 4172.57                                                                                                                                                                                                                                 | 2871.09                                                                                                                                                                          | 2782.82                                                                                                                                                                                                                                                                    |
| Crystal system                               | orthorhombic                                                                                                                                                                                                                            | cubic                                                                                                                                                                            | monoclinic                                                                                                                                                                                                                                                                 |
| Space group (Nr.)                            | <i>Pmn2<sub>1</sub></i>                                                                                                                                                                                                                 | <i>I432</i>                                                                                                                                                                      | <i>P2<sub>1</sub>/n</i>                                                                                                                                                                                                                                                    |
| a (Å)                                        | 22.0234(10)                                                                                                                                                                                                                             | 32.0910(3)                                                                                                                                                                       | 19.4181(2)                                                                                                                                                                                                                                                                 |
| b (Å)                                        | 15.8771(5)                                                                                                                                                                                                                              | 32.0910(3)                                                                                                                                                                       | 16.6427(2)                                                                                                                                                                                                                                                                 |
| c (Å)                                        | 28.8999(6)                                                                                                                                                                                                                              | 32.0910(4)                                                                                                                                                                       | 20.1511(4)                                                                                                                                                                                                                                                                 |
| α (°)                                        | 90                                                                                                                                                                                                                                      | 90                                                                                                                                                                               | 90                                                                                                                                                                                                                                                                         |
| β (°)                                        | 90                                                                                                                                                                                                                                      | 90                                                                                                                                                                               | 107.688(2)                                                                                                                                                                                                                                                                 |
| γ (°)                                        | 90                                                                                                                                                                                                                                      | 90                                                                                                                                                                               | 90                                                                                                                                                                                                                                                                         |
| Volume (Å <sup>3</sup> )                     | 10105.4(6)                                                                                                                                                                                                                              | 33048.3(9)                                                                                                                                                                       | 6204.36(17)                                                                                                                                                                                                                                                                |
| Z                                            | 2                                                                                                                                                                                                                                       | 6                                                                                                                                                                                | 2                                                                                                                                                                                                                                                                          |
| Density <sub>calc</sub> (g/cm <sup>3</sup> ) | 1.282                                                                                                                                                                                                                                   | 0.829                                                                                                                                                                            | 1.489                                                                                                                                                                                                                                                                      |
| Abs. Coeff. μ (mm <sup>-1</sup> )            | 6.691                                                                                                                                                                                                                                   | 5.639                                                                                                                                                                            | 7.946                                                                                                                                                                                                                                                                      |
| Temperature (K)                              | 173                                                                                                                                                                                                                                     | 173                                                                                                                                                                              | 173                                                                                                                                                                                                                                                                        |
| Total reflections                            | 35091                                                                                                                                                                                                                                   | 18693                                                                                                                                                                            | 44175                                                                                                                                                                                                                                                                      |
| Min-max 2θ (°)                               | 5.566 to 154.982                                                                                                                                                                                                                        | 5.508 to 152.928                                                                                                                                                                 | 5.536 to 153.418                                                                                                                                                                                                                                                           |
| Unique reflections                           | 13913                                                                                                                                                                                                                                   | 5244                                                                                                                                                                             | 12329                                                                                                                                                                                                                                                                      |
| R <sub>1</sub> [I ≥ 2σ]                      | 0.0704                                                                                                                                                                                                                                  | 0.0904                                                                                                                                                                           | 0.0706                                                                                                                                                                                                                                                                     |
| wR <sub>2</sub> (all data)                   | 0.2147                                                                                                                                                                                                                                  | 0.3016                                                                                                                                                                           | 0.1953                                                                                                                                                                                                                                                                     |
| R <sub>int</sub>                             | 0.0575                                                                                                                                                                                                                                  | 0.0857                                                                                                                                                                           | 0.0838                                                                                                                                                                                                                                                                     |
| Goodness of fit on F <sup>2</sup>            | 1.038                                                                                                                                                                                                                                   | 1.041                                                                                                                                                                            | 1.049                                                                                                                                                                                                                                                                      |
| Parameters                                   | 1208                                                                                                                                                                                                                                    | 255                                                                                                                                                                              | 742                                                                                                                                                                                                                                                                        |
| Restraints                                   | 518                                                                                                                                                                                                                                     | 179                                                                                                                                                                              | 22                                                                                                                                                                                                                                                                         |
| Largest diff. peak/hole (e Å <sup>-3</sup> ) | 0.66/-0.43                                                                                                                                                                                                                              | 0.60/-0.49                                                                                                                                                                       | 0.92/-0.72                                                                                                                                                                                                                                                                 |

| Compound                                     | <b>Ti<sub>15</sub>(PA)<sub>15</sub></b>                                                                                                                                                                                  | <b>Ti<sub>6</sub>(PA)<sub>8</sub></b>                                                                                                        | <b>Ti<sub>17</sub>(PA)<sub>4</sub></b>                                                                                                         |
|----------------------------------------------|--------------------------------------------------------------------------------------------------------------------------------------------------------------------------------------------------------------------------|----------------------------------------------------------------------------------------------------------------------------------------------|------------------------------------------------------------------------------------------------------------------------------------------------|
| Formula unit                                 | Ti <sub>15</sub> O <sub>61</sub> N <sub>27</sub> C <sub>121</sub> H <sub>111</sub>                                                                                                                                       | Ti <sub>6</sub> O <sub>28</sub> N <sub>12</sub> C <sub>60</sub> H <sub>60</sub>                                                              | Ti <sub>17</sub> O <sub>48</sub> N <sub>4</sub> C <sub>56</sub> H <sub>96</sub>                                                                |
| CCDC number                                  | 2126647                                                                                                                                                                                                                  | 2126645                                                                                                                                      | 2126648                                                                                                                                        |
| Moieties                                     | [H <sub>2</sub> Ti <sub>15</sub> O <sub>21</sub> (O <sub>2</sub> NC <sub>6</sub> H <sub>4</sub> ) <sub>15</sub> (O <sub>2</sub> CH) <sub>5</sub> ](NC <sub>4</sub> H <sub>11</sub> )·11(NC <sub>2</sub> H <sub>3</sub> ) | Ti <sub>6</sub> O <sub>8</sub> (O <sub>2</sub> NC <sub>6</sub> H <sub>4</sub> ) <sub>8</sub> (ONC <sub>3</sub> H <sub>7</sub> ) <sub>4</sub> | Ti <sub>17</sub> O <sub>24</sub> (O <sub>2</sub> NC <sub>6</sub> H <sub>4</sub> ) <sub>4</sub> (OC <sub>2</sub> H <sub>5</sub> ) <sub>16</sub> |
| Formula weight (g/mol)                       | 3637.33                                                                                                                                                                                                                  | 1684.60                                                                                                                                      | 2407.1                                                                                                                                         |
| Crystal system                               | triclinic                                                                                                                                                                                                                | tetragonal                                                                                                                                   | monoclinic                                                                                                                                     |
| Space group (Nr.)                            | <i>P</i> -1                                                                                                                                                                                                              | <i>I</i> -4                                                                                                                                  | <i>P</i> 2 <sub>1</sub> / <i>m</i>                                                                                                             |
| a (Å)                                        | 15.9539(6)                                                                                                                                                                                                               | 15.2721(2)                                                                                                                                   | 14.1453(18)                                                                                                                                    |
| b (Å)                                        | 17.4707(9)                                                                                                                                                                                                               | 15.2721(2)                                                                                                                                   | 25.9558(14)                                                                                                                                    |
| c (Å)                                        | 29.0128(9)                                                                                                                                                                                                               | 15.8807(3)                                                                                                                                   | 14.178(2)                                                                                                                                      |
| α (°)                                        | 89.709(3)                                                                                                                                                                                                                | 90                                                                                                                                           | 90                                                                                                                                             |
| β (°)                                        | 80.240(3)                                                                                                                                                                                                                | 90                                                                                                                                           | 112.466(15)                                                                                                                                    |
| γ (°)                                        | 81.263(4)                                                                                                                                                                                                                | 90                                                                                                                                           | 90                                                                                                                                             |
| Volume (Å <sup>3</sup> )                     | 7875.3(6)                                                                                                                                                                                                                | 3703.97(12)                                                                                                                                  | 4810.3(11)                                                                                                                                     |
| Z                                            | 2                                                                                                                                                                                                                        | 2                                                                                                                                            | 2                                                                                                                                              |
| Density <sub>calc</sub> (g/cm <sup>3</sup> ) | 1.343                                                                                                                                                                                                                    | 1.510                                                                                                                                        | 1.662                                                                                                                                          |
| Abs. Coeff. μ (mm <sup>-1</sup> )            | 6.825                                                                                                                                                                                                                    | 6.016                                                                                                                                        | 12.086                                                                                                                                         |
| Temperature (K)                              | 173                                                                                                                                                                                                                      | 173                                                                                                                                          | 173                                                                                                                                            |
| Total reflections                            | 73602                                                                                                                                                                                                                    | 5116                                                                                                                                         | 15616                                                                                                                                          |
| Min-max 2θ (°)                               | 5.924 to 153.186                                                                                                                                                                                                         | 8.032 to 152.328                                                                                                                             | 6.762 to 156.22                                                                                                                                |
| Unique reflections                           | 29824                                                                                                                                                                                                                    | 3062                                                                                                                                         | 7758                                                                                                                                           |
| R <sub>1</sub> [I>=2σ]                       | 0.0831                                                                                                                                                                                                                   | 0.0301                                                                                                                                       | 0.1015                                                                                                                                         |
| wR <sub>2</sub> (all data)                   | 0.2729                                                                                                                                                                                                                   | 0.0757                                                                                                                                       | 0.3121                                                                                                                                         |
| R <sub>int</sub>                             | 0.1059                                                                                                                                                                                                                   | 0.0322                                                                                                                                       | 0.0544                                                                                                                                         |
| Goodness of fit on F <sup>2</sup>            | 0.944                                                                                                                                                                                                                    | 1.013                                                                                                                                        | 1.021                                                                                                                                          |
| Parameters                                   | 1725                                                                                                                                                                                                                     | 243                                                                                                                                          | 641                                                                                                                                            |
| Restraints                                   | 2097                                                                                                                                                                                                                     | 0                                                                                                                                            | 180                                                                                                                                            |
| Largest diff. peak/hole (e Å <sup>-3</sup> ) | 0.57/-0.55                                                                                                                                                                                                               | 0.33/-0.30                                                                                                                                   | 1.48/-1.11                                                                                                                                     |

## S2. Additional characterization data

**FTIR spectra.** The FTIR spectra of the clusters are shown below.

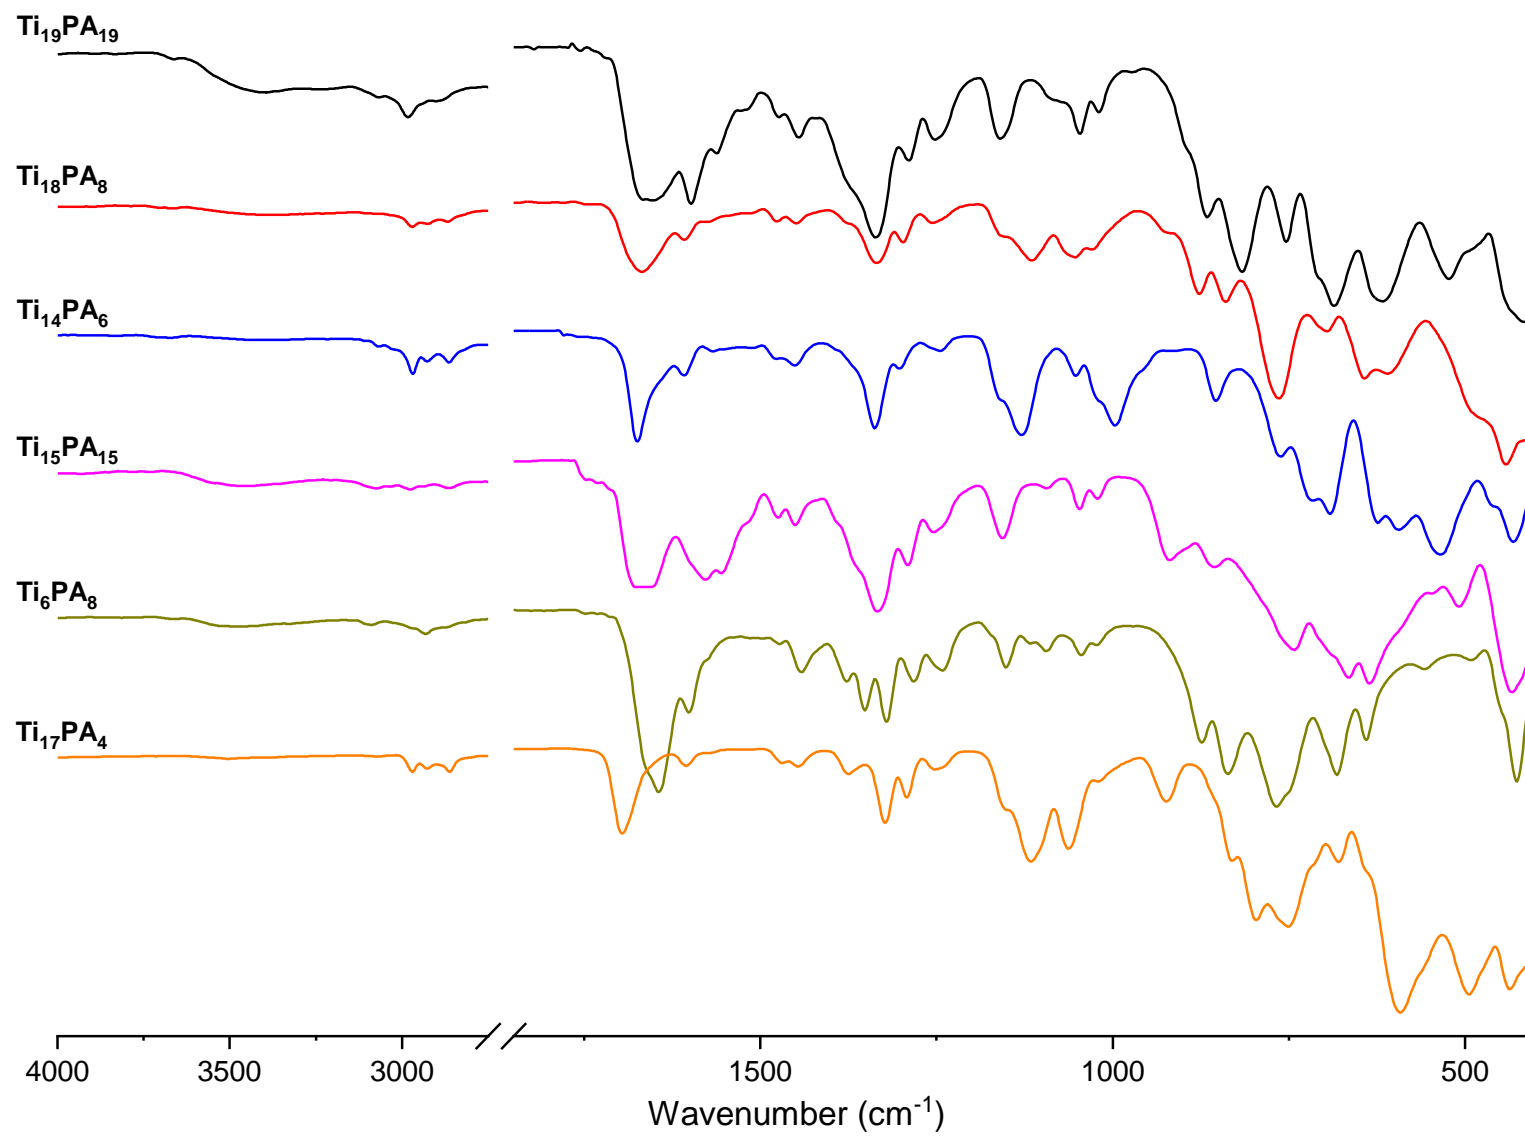

**Raman spectra.** The representative Raman spectra of the clusters are shown below.

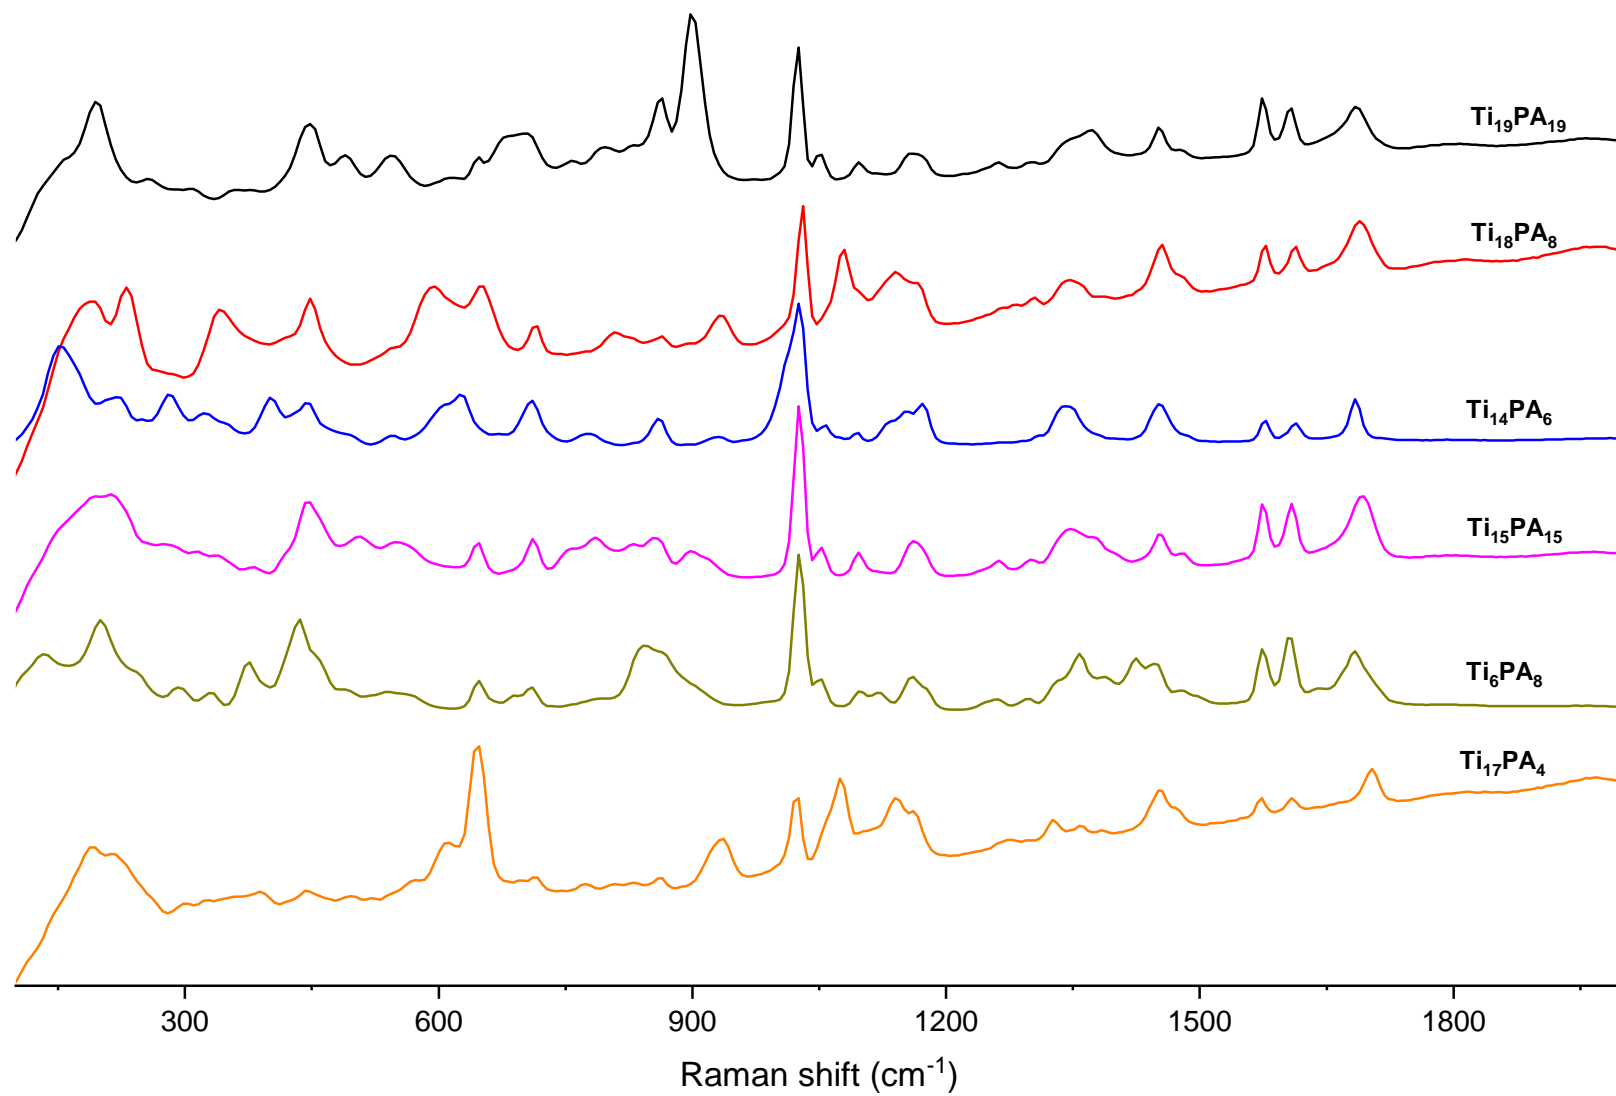

**$^1\text{H}$  NMR spectrum.**  $^1\text{H}$  NMR spectrum of  $\text{Ti}_{17}\text{PA}_4$ , measured on a Bruker AV-500 spectrometer using  $\text{CDCl}_3$  as the solvent.

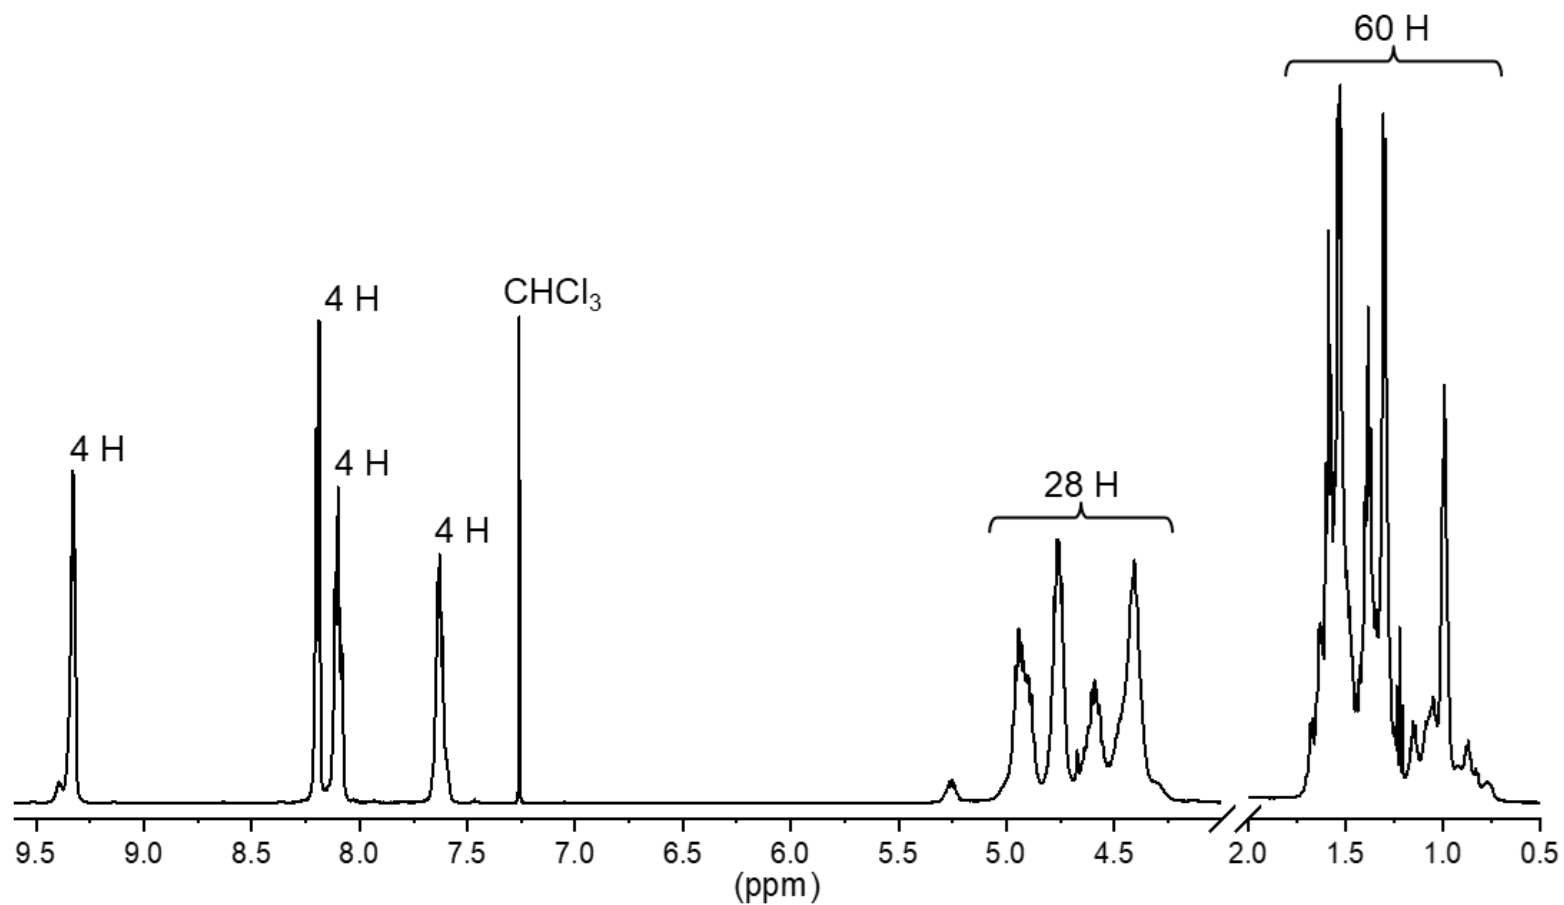

The peaks ranging 4-5.2 are assigned as CH and  $\text{CH}_2$ . Those ranging 1-1.8 are assigned as  $\text{CH}_3$ . According to the ratio of the two groups, i.e., 28 : 60, we postulate that  $\text{Ti}_{17}\text{PA}_4$  contains approximately 12 OEt and 4 OPr groups. However, there may be some uncertainties since some disordered alcohol solvent molecules may be present in the samples which could not be determined by SC-XRD.

**Powder X-ray diffraction data.** The spectra were recorded using a Rigaku SmartLab 9KW X-ray diffraction instrument.

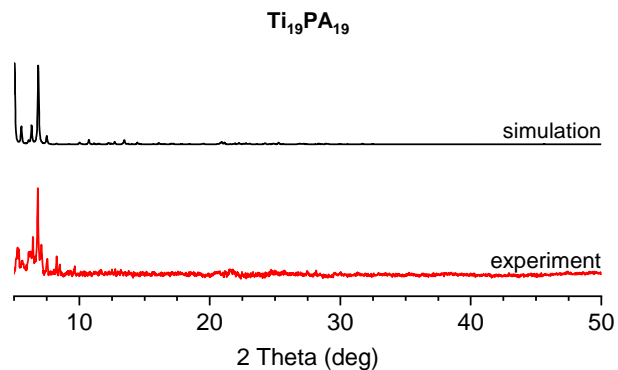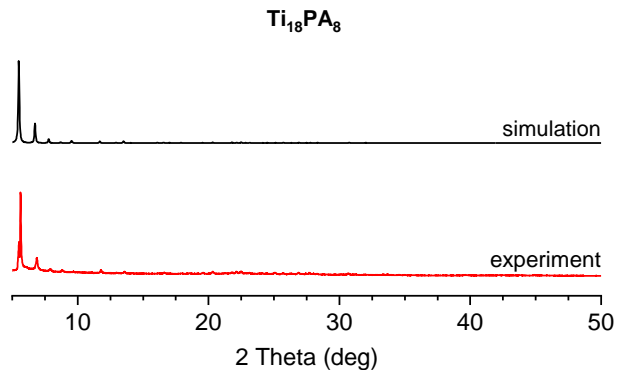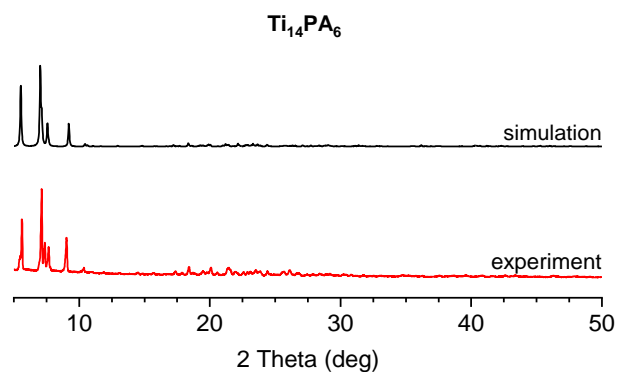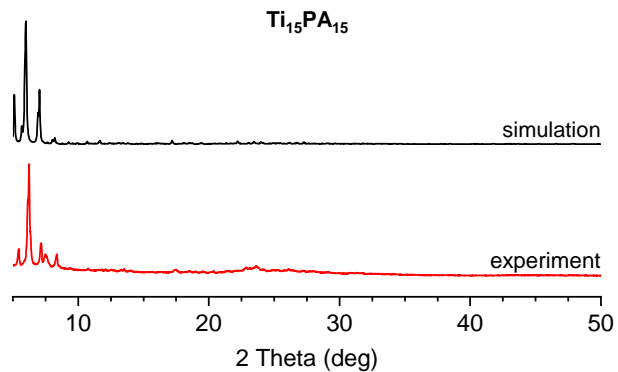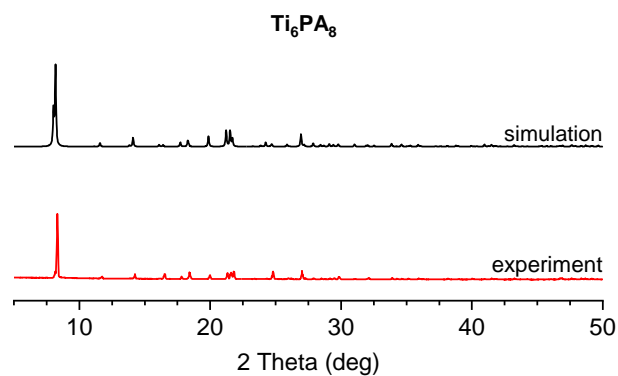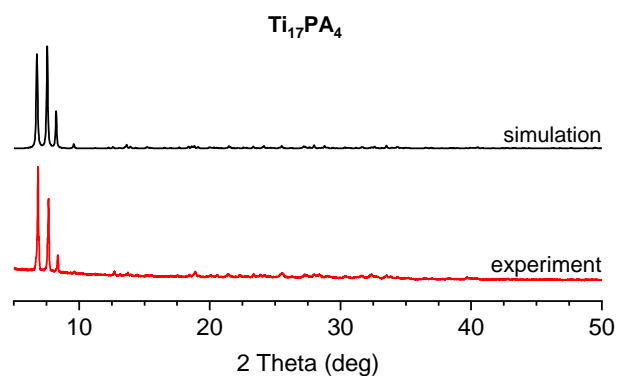

**Ellipsoidal model.** The ellipsoidal models the molecules showing 50% of probability

**Ti<sub>19</sub>PA<sub>19</sub>**

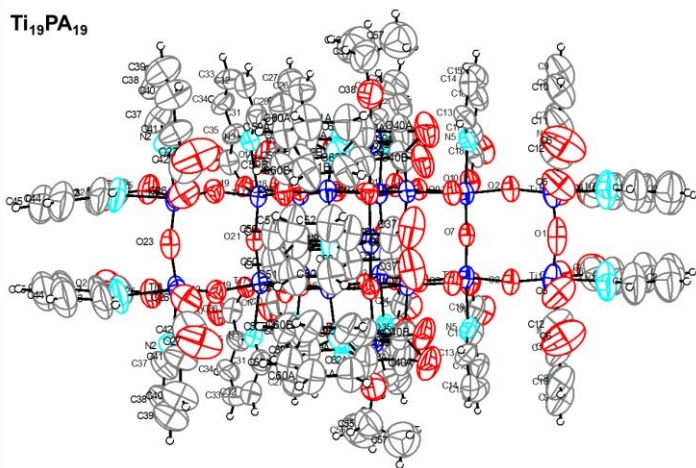

**Ti<sub>18</sub>PA<sub>8</sub>**

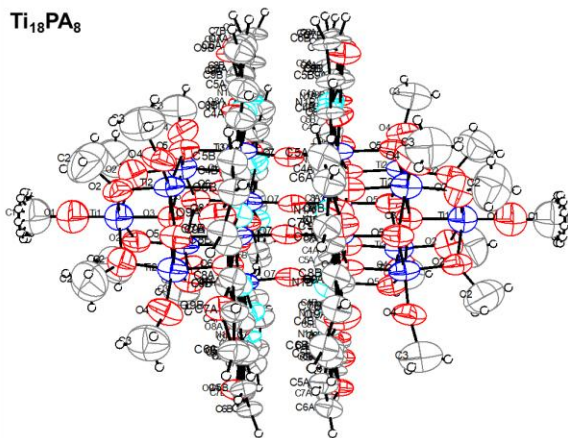

**Ti<sub>14</sub>PA<sub>6</sub>**

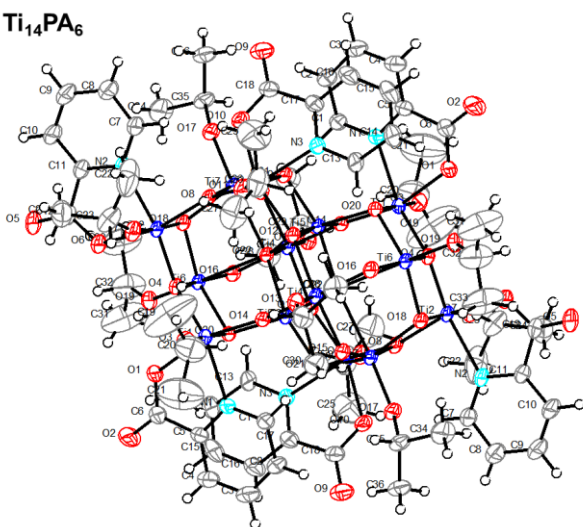

**Ti<sub>15</sub>PA<sub>15</sub>**

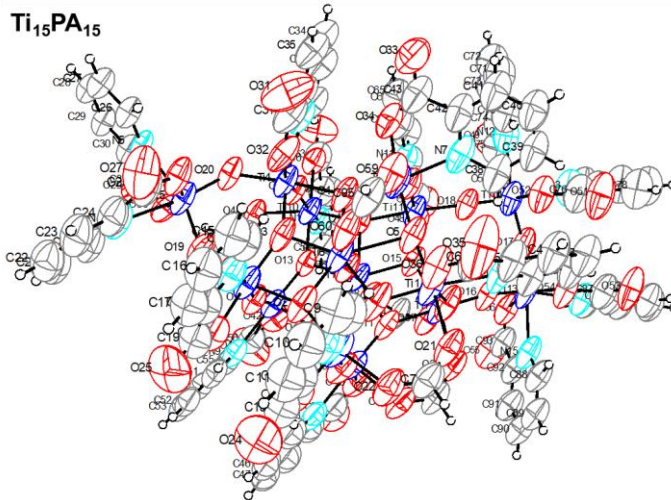

**Ti<sub>6</sub>PA<sub>8</sub>**

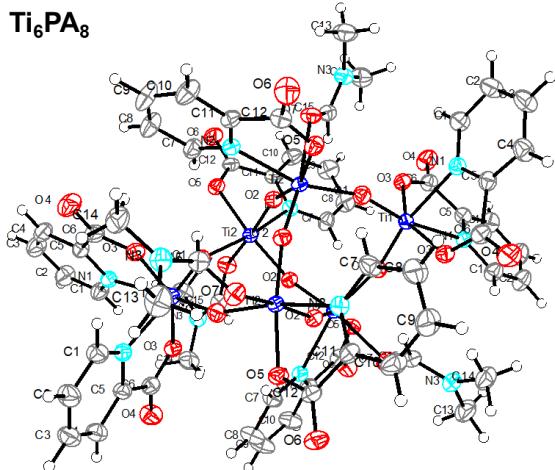

**Ti<sub>17</sub>PA<sub>4</sub>**

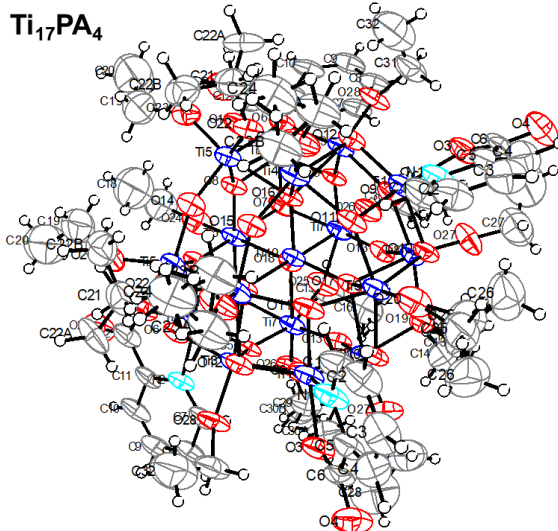



### S3. Supplementary figures and discussion

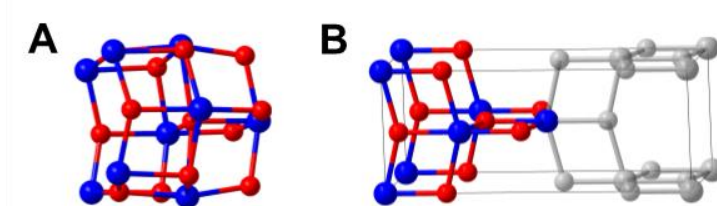

**Figure S1.** The structure of  $\text{Ti}_9\text{O}_{13}$  unit and  $\text{Ti}_7\text{O}_9$  half-cell of anatase  $\text{TiO}_2$ .

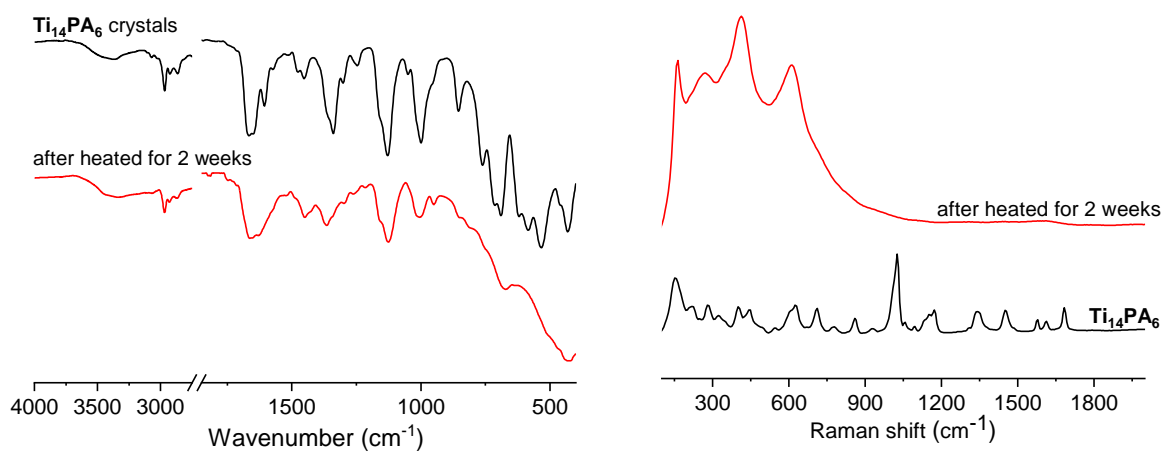

**Figure S2.** FTIR spectra and Raman spectra of the rutile  $\text{TiO}_2$  obtained by increasing the solvothermal reaction time of  $\text{Ti}_{14}\text{PA}_6$  to ca. 2 weeks.

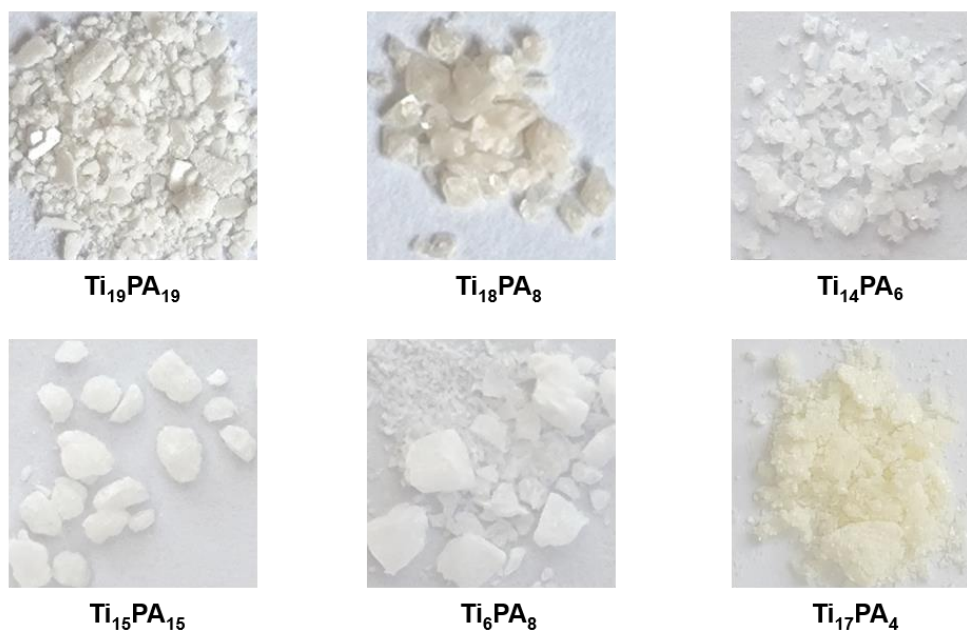

**Figure S3.** The photos of the crystals.

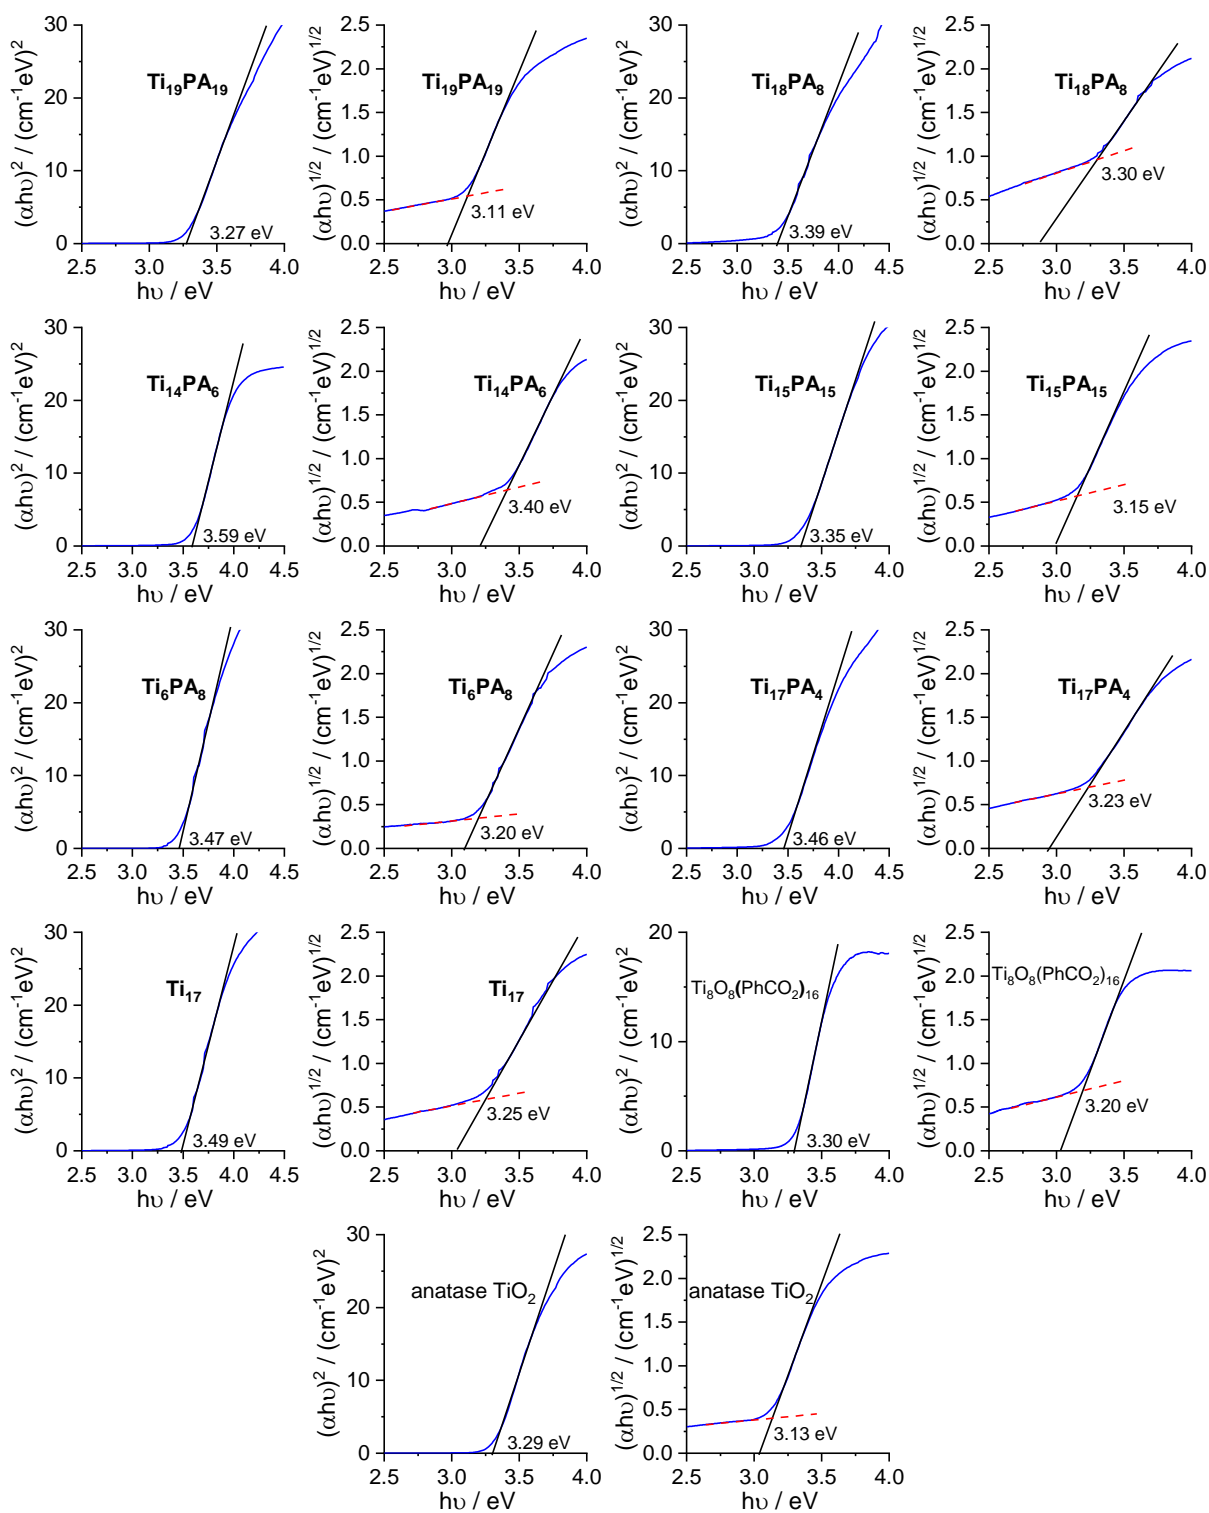

**Figure S4.** Calculations of direct band gap and indirect band gap values based on UV-vis diffuse reflectance spectra.

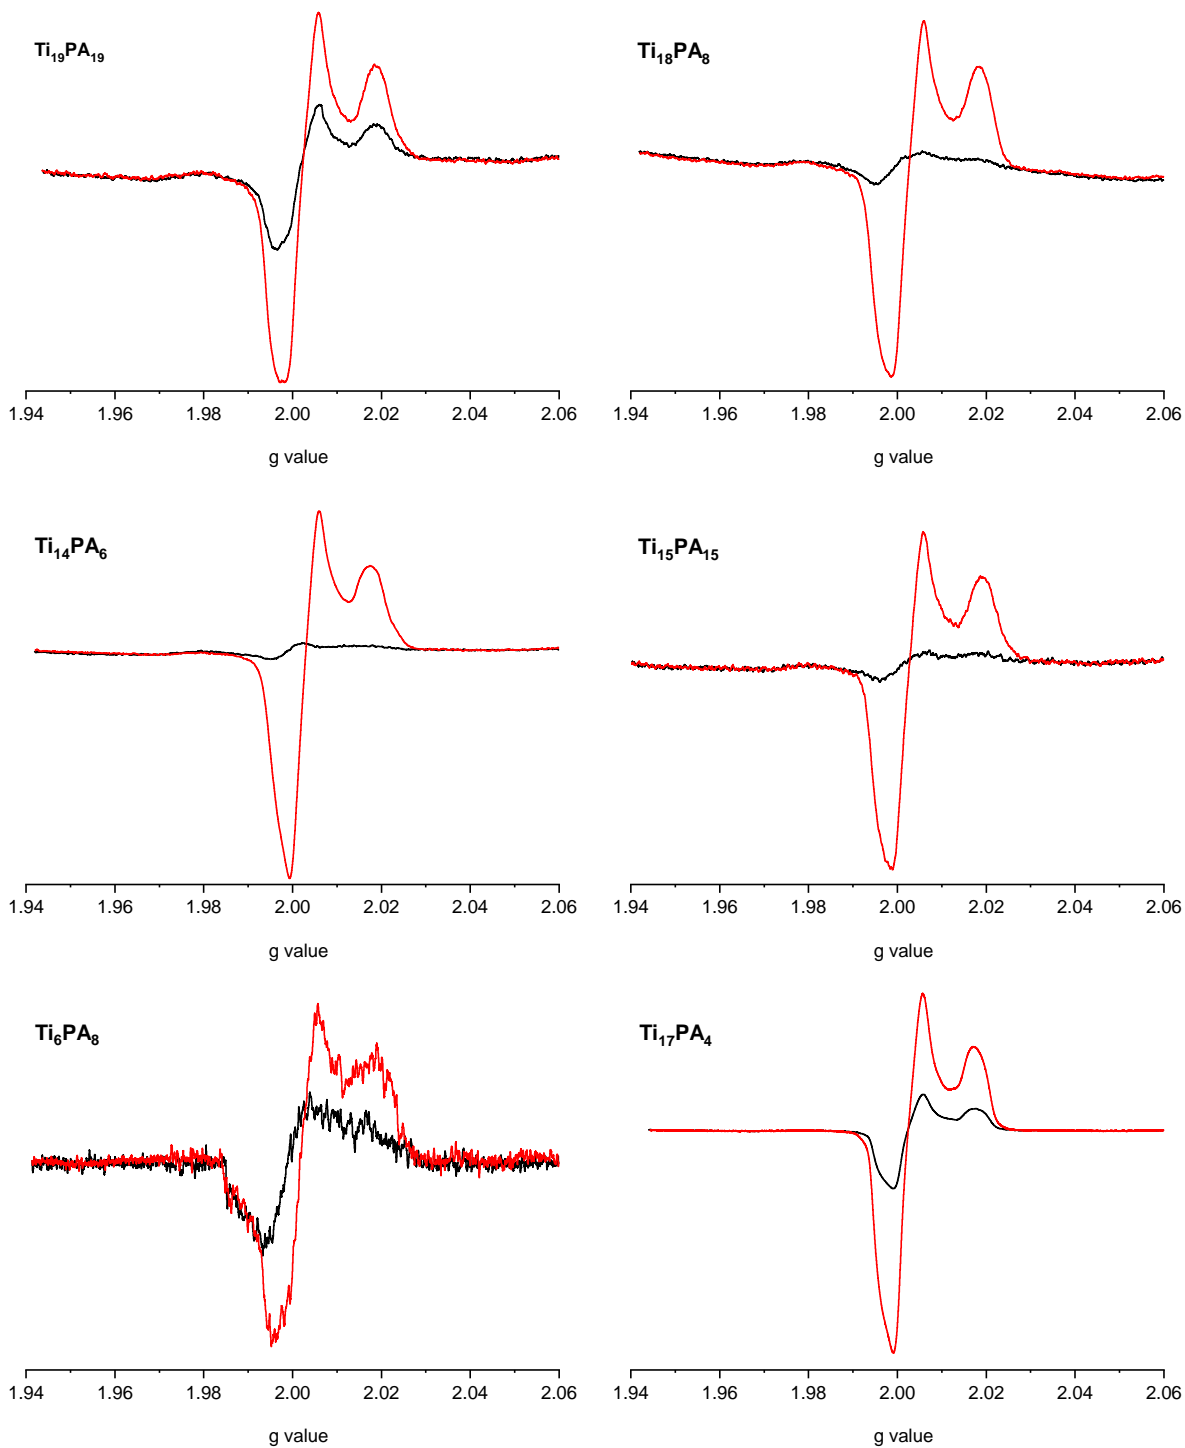

**Figure S5.** EPR spectra of the TOCs in dark (black) and after irradiation (red curve) under 1 atm  $N_2$ .

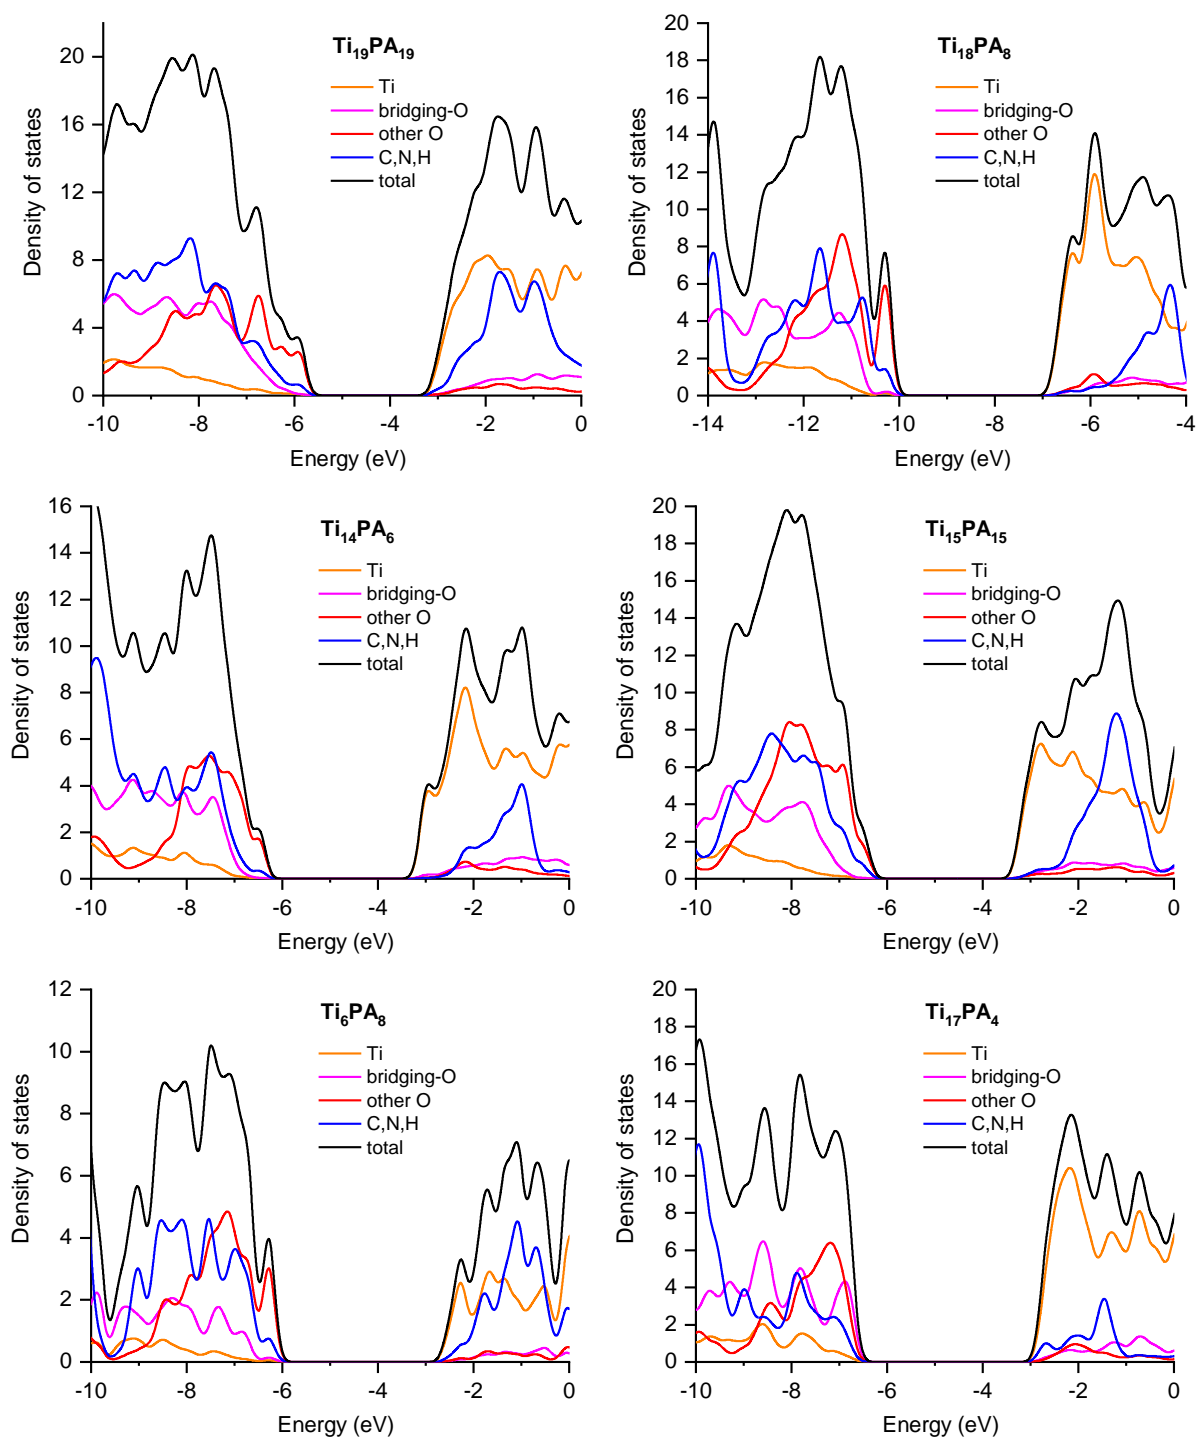

**Figure S6.** Density of states of the TOCs illustrating the contributions of various moieties to the frontier orbitals. Figure 8B is reproduced here for comparison.
